# Supplementary material
Source: publisher figshare collection journal article supplement (https://frontiersin.figshare.com/ndownloader/files/22117632)
Supplement: Supplementary file 1 [file 22117632]

## *Supplementary Material*

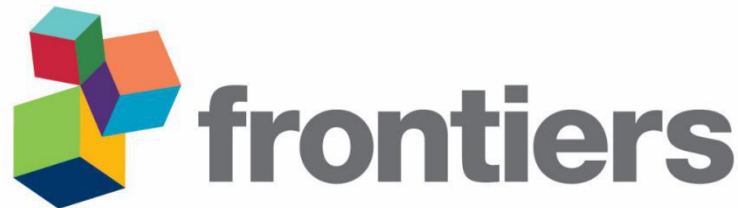

**Supplementary Figure 1.** (A) Schematic injection site in NAcC. (Bi-v) Left, representative coronal brain sections near CTB-488 (green) injection sites in rNAcC; Right, Representative coronal brain sections near CTB-555 (red) injection sites in cNAcC. Scale bar = 400  $\mu\text{m}$ . **Related to figure 1**

**Supplementary Figure 2.** (A) Schematic injection site in NAcS. (Bi-v) Left, representative coronal brain sections near CTB-488 (green) injection sites in NAcMS; Right, representative coronal brain sections near CTB-555 (red) injection sites in NAcLS. Scale bar = 600  $\mu\text{m}$ . **Related to figure 1**

**Supplementary Table 1.** Statics for the distributions of input neurons projecting to subregions of NAcC and NAcS. **Related to figure 8.**

**Supplementary Table 2.** The number of input cells calculated in all experiments
